# Supplementary material for: A PEGylated colorimetric and turn-on fluorescent sensor based on BODIPY for Hg(ii) detection in water
Source: Royal Society of Chemistry journal article supplement (doi:10.1039/c5py00390c), 2015-01-01
Supplement: c5py00390c1.pdf [file c5py00390c1.pdf]

## Supporting Information

### **A PEGylated colorimetric and turn-on fluorescent sensor based on BODIPY for Hg(II) detection in water**

Bin Wu<sup>1</sup>, Lei Xu<sup>1</sup>, Shangfeng Wang<sup>1</sup>, Yong Wang<sup>2</sup> and Weian Zhang<sup>1\*</sup>

<sup>1</sup>Shanghai Key Laboratory of Functional Materials Chemistry, East China University of Science and Technology, 130 Meilong Road, Shanghai 200237, China.

<sup>2</sup>State Key Laboratory of Materials-Oriented Chemical Engineering, College of Chemistry and Chemical Engineering, Nanjing Tech University, Nanjing 210009, China.

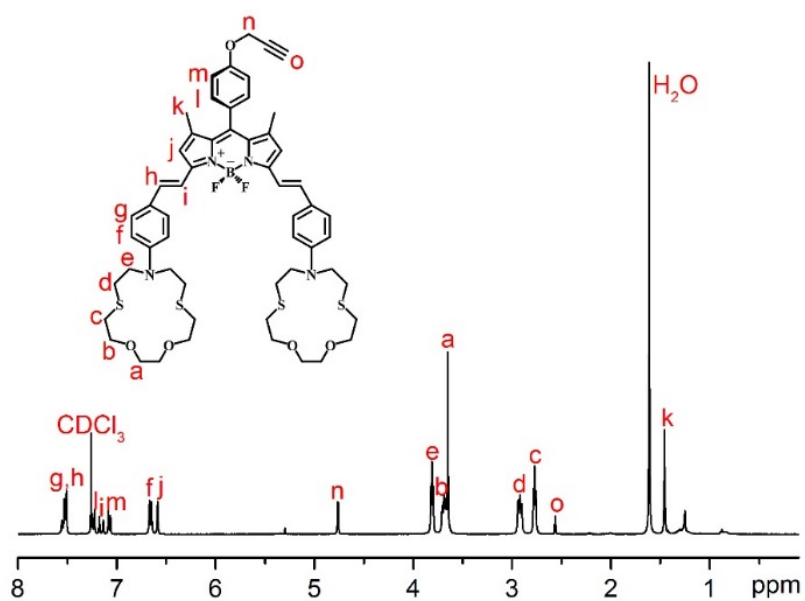

Fig. S1. <sup>1</sup>H NMR spectrum of compound DMS1 in CDCl<sub>3</sub>.

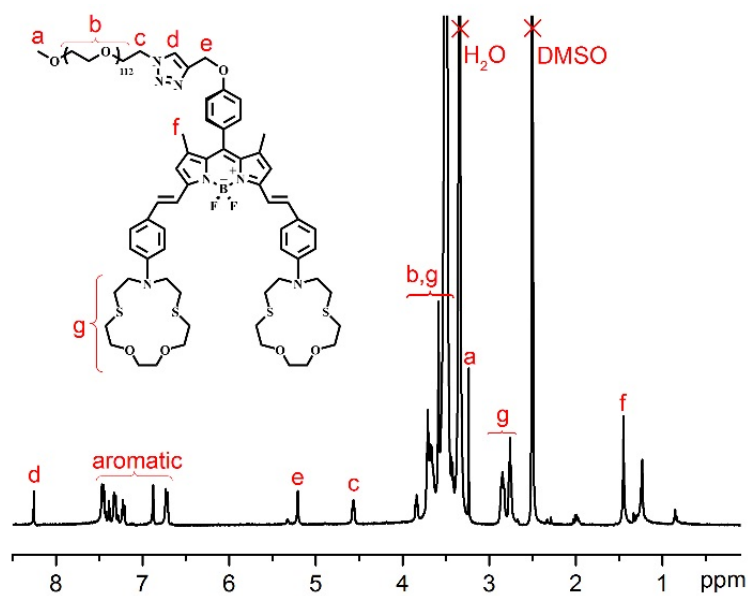

Fig. S2. <sup>1</sup>H NMR spectrum of PEG-DMS2 in DMSO-*d*<sub>6</sub>.

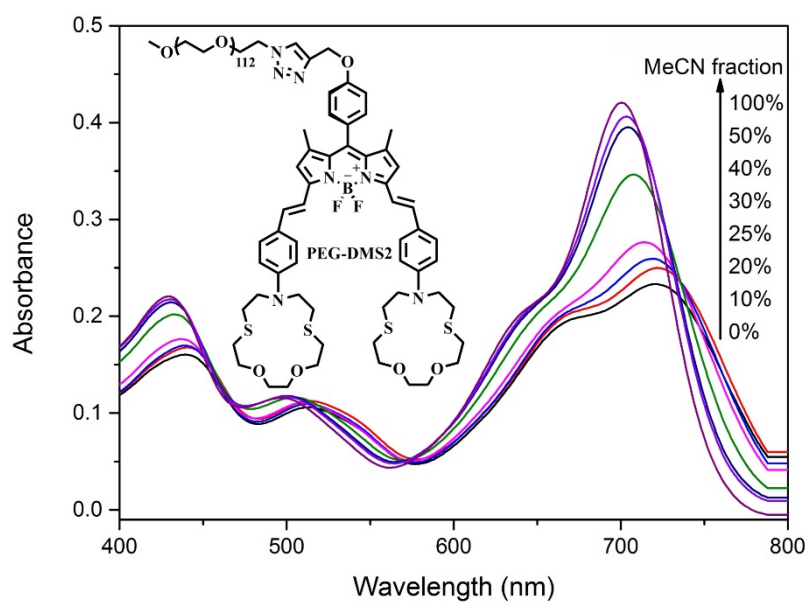

**Fig. S3.** UV-Vis spectra of 5 μM PEG-DMS2 in MeCN/water mixtures with different MeCN fractions.

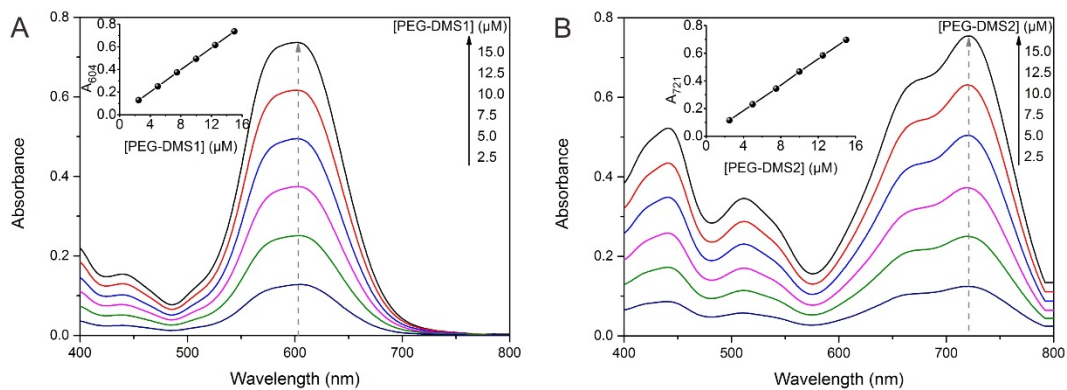

**Fig. S4.** UV-Vis spectra of PEG-DMS1 (A) and PEG-DMS2 (B) in pure water at different concentrations. Insets: the Q-band absorbance vs. the concentration of PEG-DMS.

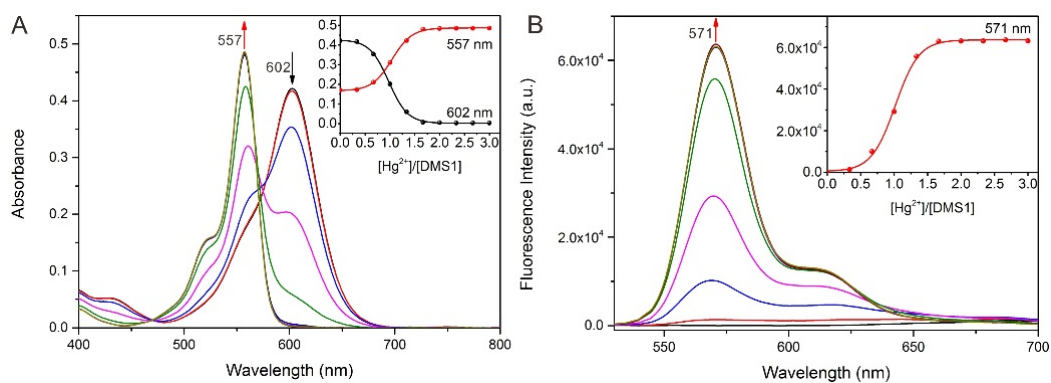

**Fig. S5.** UV-Vis (A) and fluorescence (B) titration of 5  $\mu$ M DMS1 with  $Hg^{2+}$  (3 equiv.) in MeCN. Insets: absorbance (inset A) and fluorescence (inset B) intensity as a function of the molar ratio ( $[Hg^{2+}]/[DMS1]$ ).

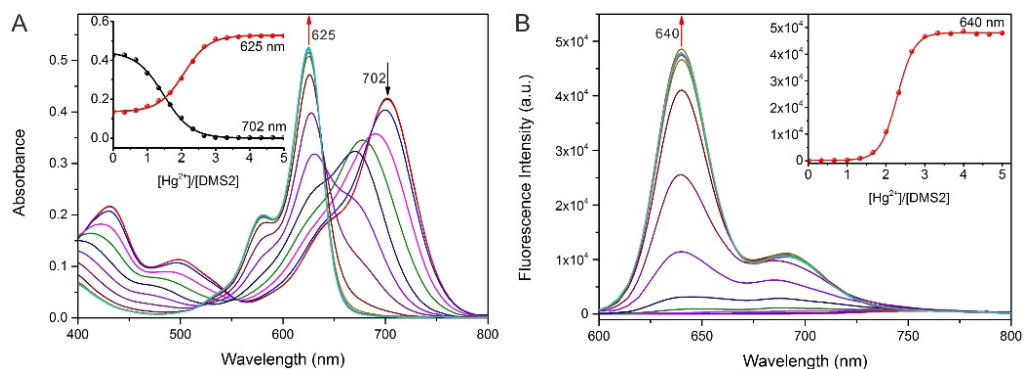

**Fig. S6.** UV-Vis (A) and fluorescence (B) titration of 5  $\mu$ M DMS2 with  $Hg^{2+}$  (5 equiv.) in MeCN. Insets: absorbance (inset A) and fluorescence (inset B) intensity as a function of the molar ratio ( $[Hg^{2+}]/[DMS2]$ ).

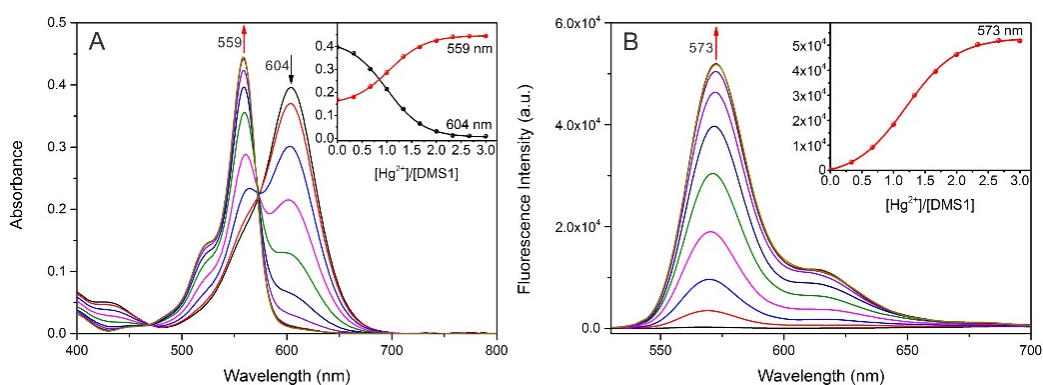

**Fig. S7.** UV-Vis (A) and fluorescence (B) titration of 5  $\mu$ M DMS1 with  $Hg^{2+}$  (3 equiv.) in a MeCN- $H_2O$  mixture (5/5, v/v). Insets: the absorbance (inset A) and fluorescence (inset B) intensity as a function of the molar ratio ( $[Hg^{2+}]/[DMS1]$ ).

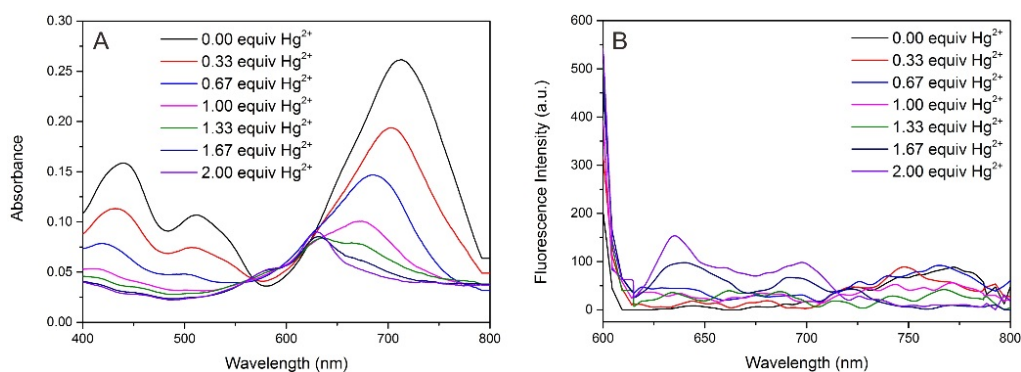

**Fig. S8.** UV-Vis (A) and fluorescence (B) titration of 5  $\mu$ M DMS2 with  $Hg^{2+}$  (2 equiv.) in a MeCN- $H_2O$  mixture (5/5, v/v).

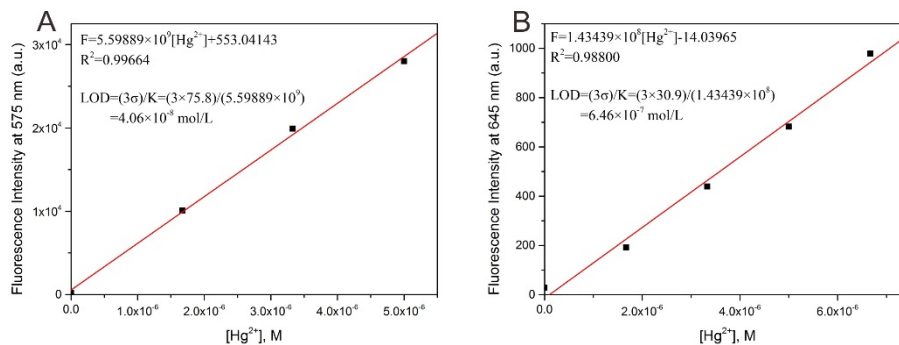

**Fig. S9.** The fluorescence intensity of PEG-DMS (5  $\mu\text{M}$ ) as a function of  $\text{Hg}^{2+}$  concentration in water. (A) PEG-DMS1,  $\text{Hg}^{2+}$  concentration: 0 – 5  $\mu\text{M}$ ,  $\lambda_{\text{ex}} = 510 \text{ nm}$ ; (B) PEG-DMS2,  $\text{Hg}^{2+}$  concentration: 0 – 6.67  $\mu\text{M}$ ,  $\lambda_{\text{ex}} = 590 \text{ nm}$ . The method for determining the limit of detection (LOD):<sup>1</sup>  
 $\text{LOD} = 3\sigma/K$ ,  $\sigma$ : standard deviation from the blank measurement in the absence of  $\text{Hg}^{2+}$ ;  $K$ : slope of the calibration plot.

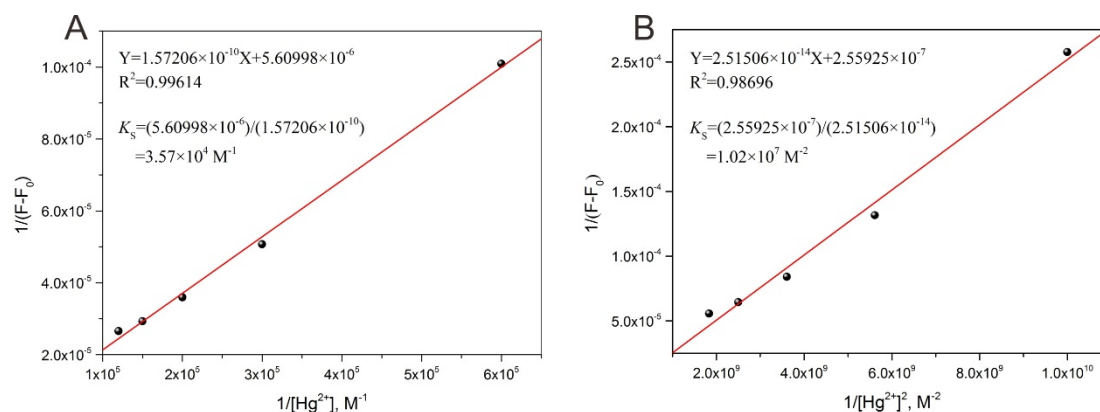

**Fig. 10.** Benesi-Hildebrand plot of PEG-DMS with  $\text{Hg}^{2+}$ . (A) PEG-DMS1; (B) PEG-DMS2.

The method for determining stability constant ( $K_s$ ) via Benesi-Hildebrand plot:<sup>2</sup>

$$\frac{1}{F - F_{\min}} = \frac{1}{F_{\max} - F_{\min}} \left[ 1 + \frac{1}{K_s [X]^n} \right]$$

$F$ : fluorescence intensity at  $\lambda_{\text{em}}$ ;  $F_{\min}$  and  $F_{\max}$  denote the fluorescence signals at minimal  $[X]$  and maximal  $[X]$ ;  $[X]$ : analyte concentration;  $n$ : stoichiometry of binding.

Table S1. Comparison of the properties of PEG-DMS with those literatures reported.

| Probes                                                                              | $\lambda_{ex}/\lambda_{em}$ (nm) | Detection medium                        | Limit of detection                                |
|-------------------------------------------------------------------------------------|----------------------------------|-----------------------------------------|---------------------------------------------------|
| 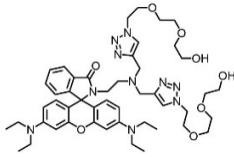   | 530/580                          | water                                   | 2.3 ppb <sup>1</sup>                              |
|    | 370/655                          | MeCN : HEPES buffer<br>(1:1, v/v)       | 3 ppb <sup>2</sup>                                |
|    | 500/600                          | THF                                     | not reported <sup>3</sup>                         |
|   | 640/655                          | THF                                     | not reported <sup>4</sup>                         |
|  | 510/572                          | MeCN : water<br>(2:3, v/v)              | not reported <sup>5</sup>                         |
|  | 380/566                          | PBS solution to obtain<br>nanoparticles | <1 ppb <sup>6</sup>                               |
|  | 500/584                          | water                                   | 3.5 ppb at 25 °C <sup>7</sup><br>1.6 ppb at 40 °C |
|  | 420/593                          | HEPES buffer<br>pH = 7.0                | 20 ppb <sup>8</sup>                               |
| <b>PEG-DMS1</b>                                                                     | 510/575                          | water                                   | 8.1 ppb                                           |

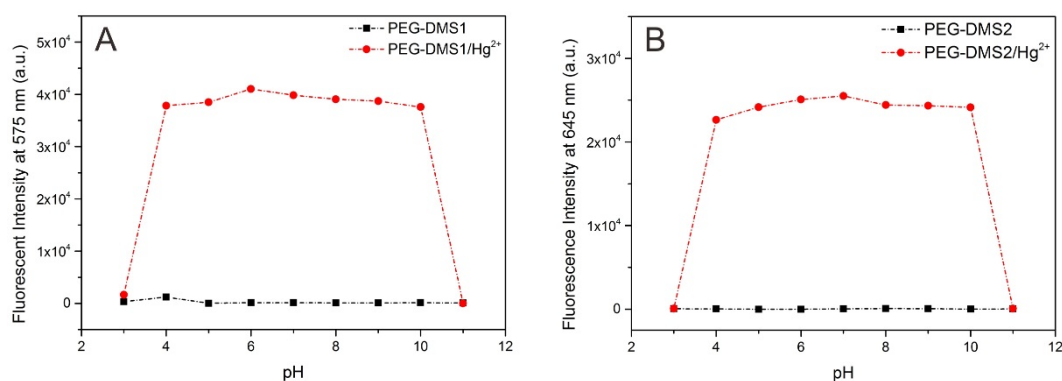

**Fig. S11.** Fluorescence intensity of PEG-DMS (5  $\mu$ M) in water at different pH both in the absence and presence of  $\text{Hg}^{2+}$ . (A) PEG-DMS1, 5 equiv. of  $\text{Hg}^{2+}$ ,  $\lambda_{\text{ex}} = 510$  nm; (B) PEG-DMS2, 10 equiv. of  $\text{Hg}^{2+}$ ,  $\lambda_{\text{ex}} = 590$  nm.

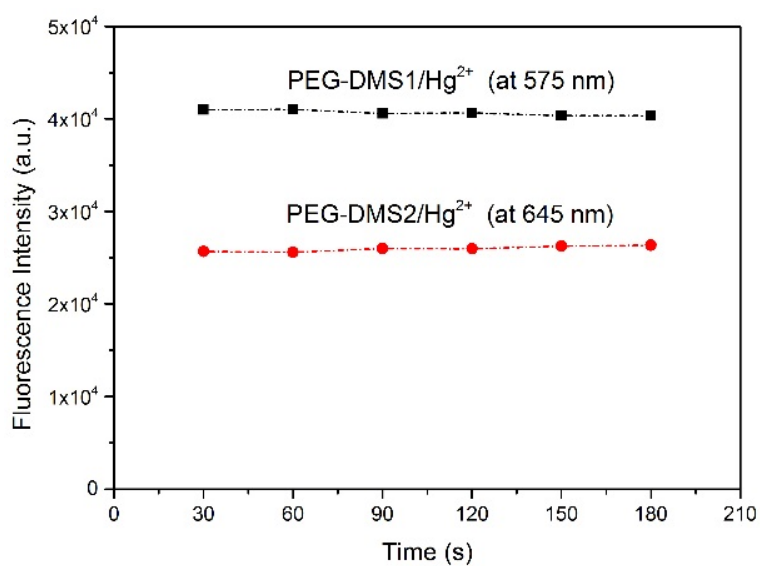

**Fig. 12.** Time-dependent fluorescence intensity of PEG-DMS (5  $\mu$ M) upon addition of  $\text{Hg}^{2+}$ . 5 equiv. of  $\text{Hg}^{2+}$  for PEG-DMS1 ( $\lambda_{\text{ex}} = 510$  nm); 10 equiv. of  $\text{Hg}^{2+}$  for PEG-DMS2 ( $\lambda_{\text{ex}} = 590$  nm).



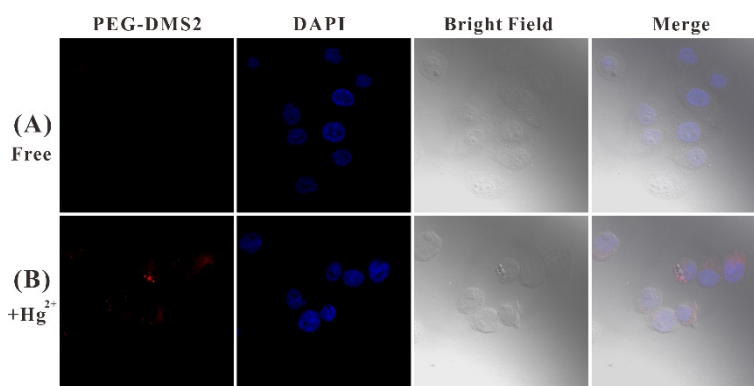

**Fig. 13.** CLSM images of HeLa cells incubated within 20  $\mu\text{M}$  of PEG-DMS1 for 12 h before (A) and after (B) being treated 20  $\mu\text{M}$  of  $\text{Hg}^{2+}$  for 0.5 h. The images from left to right were PEG-DMS1 fluorescence (emission collected at 620 – 730 nm upon  $\lambda_{\text{ex}} = 633$  nm), nuclei staining with DAPI (emission collected at 425 – 475 nm upon  $\lambda_{\text{ex}} = 405$  nm), bright field and overlays of images.

## References

1. K. Tiwari, M. Mishra and V. P. Singh, *RSC Adv.*, 2013, **3**, 12124-12132.
2. N. Boens, V. Leen and W. Dehaen, *Chem. Soc. Rev.*, 2012, **41**, 1130-1172.
3. K.-B. Li, H. Wang, Y. Zang, X.-P. He, J. Li, G.-R. Chen and H. Tian, *ACS Appl. Mater. Interfaces*, 2014, **6**, 19600-19605.
4. Y. Zhao, X. Lv, Y. Liu, J. Liu, Y. Zhang, H. Shi and W. Guo, *J. Mater. Chem.*, 2012, **22**, 11475.
5. A. Coskun and E. U. Akkaya, *J. Am. Chem. Soc.*, 2006, **128**, 14474-14475.
6. S. Atilgan, I. Kutuk and T. Ozdemir, *Tetrahedron Lett.*, 2010, **51**, 892-894.
7. X. J. Jiang, C. L. Wong, P. C. Lo and D. K. Ng, *Dalton Trans.*, 2012, **41**, 1801-1807.
8. Y. Qu, X. Zhang, Y. Wu, F. Li and J. Hua, *Polym. Chem.*, 2014, **5**, 3396-3403.
9. J. Hu, C. Li and S. Liu, *Langmuir*, 2010, **26**, 724-729.
10. C. Ma, F. Zeng, L. Huang and S. Wu, *J. Phys. Chem. B*, 2011, **115**, 874-882.
